# Supplementary material for: Clinical Nursing Students’ Perception of Their Mentors' Assessment Literacy: Student Competence, Self-Efficacy, and Gender Difference
Source: Research Square preprint supplement (doi:10.21203/rs.3.rs-5792871/v1), 2025-01-20
Supplement: Supplementary file 1 [file d8819d65da7588a5eab3a0a5.docx]

# Appendix: Analysis and results of the Psychometric properties of the students’ perception of their nurse mentors’ assessment literacy (SP-NMAL)

# Analysis

The psychometric properties of the scale were examined using *Winsteps*® (Version 5.6.0.0) (Linacre, 2021). Specifically, a rating scale Rasch model (Wright & Masters, 1982) was conducted to examine the unidimensionality, Rasch item fit, category structure, reliability, and differential item functioning in terms of gender. While the categorical raw score does not meet the additivity requirement for parametric analysis including regressions, Rasch model transforms the categorical raw responses to the scale into interval Rasch logit which meets such requirement. (Covic et al., 2007; Gay et al., 2016).

The unidimensionality of the scale was examined via principal component analysis (PCA) of the Rasch residual of each item (Linacre, 2021). An eigenvalue of the first contract of 2 or less indicates unidimensionality, while more than 2 indicates a potential second dimension. In the latter case, a cluster analysis of the loading of the items on the first contract was conducted. The corrected correlations (accounting for the measurement error) between the item clusters that may measure potential sub-dimensions were examined. A corrected correlation below .57 indicates a potential second latent variable, while a value above .87 indicates different clusters of the items are measuring the same thing (Linacre, 2021).

We utilized two item fit indices, the information-weighted Infit and the non-weighted Outfit mean square (MNSQ) statistics to examine the fit of individual items to Rasch model (the level to which the observed scores are in line with the predicted score by Rasch model). A desirable fit is suggested by an MNSQ within the range of 0.5 to 1.5. An MNSQ below 0.5 signifies a less effective but not detrimental fit, while an MNSQ between 1.5 and 2.0 denotes a fit that is not helpful but also not harmful. Conversely, an MNSQ exceeding 2.0 is indicative of a poor fit that can skew or undermine the measurement system (Linacre, 2021).

A well-structured category system is evidenced by Rasch-Thurstone thresholds that are unconditionally defined and ascend in a sequence corresponding to 50% cumulative probabilities. In terms of reliability, a Rasch reliability score above .70 is considered to meet the criteria for sufficient reliability, aligning with the standards of traditional testing (Linacre, 2021).

# Psychometric Properties of SP-NMAL

## Unidimensionality

The results of the PCA on the Rasch item residuals indicated that the eigenvalue for the first component was greater than 2, suggesting a potential second dimension. However, the corrected correlations between the three clusters of items ranged from .97 to 1.00, indicating that the three clusters of items were measuring the same thing. Therefore, the SP-NMAL scale's unidimensionality was supported. Also, 67% of the variance was explained by the Rasch model.

**Item fit, category structure, and reliability**

The MNSQ ranged between 0.66 and 1.36 for Infit and between 0.54 and 1.26 for Outfit, within the range of 0.5 and 1.5 (see Table A1). This finding indicates the observed scores of each item are in line with the Rasch predicted score, suggesting that the items performed well and were productive for the measurement. The Rasch-Thurstone thresholds for the five options: "Does not apply at all" (1) to "Applies perfectly" (5) were -4.90, -3.84, 0.64, and 8.11, which increased in the sequence and indicated good category structures. However, only 7% (63 out of 854) students chose Category 2 while 24% (209) students chose Category 1.

While the student ability estimates ranged from −8.51 to 12.11, the item difﬁculty estimates, taking into account the category threshold, ranged from −5.53 to 8.75. Of note, 52% (445 out of 854) of the students had an ability greater than 8.75, indicating that the items were too easy, while 1% (12 out of 854) students had less than -5.53.

**Construct validity**

Results of correlation analysis show that SP-NMAL was highly and positively correlated with their self-efficacy in nursing (*r* = .86, *p* < .001) and positively associated with their final grade (*r* = .91, *p* < .01). Moreover, the gender difference in SP-NMAL was nonsignificant (Pearson’s *r* = .05, *p* = .11). These findings indicate good construct validity.

**Table A1**

*Item statistics*

| ID | Content | Difficulty | Infit | Outfit | *r* | DIF (*p*) |
| --- | --- | --- | --- | --- | --- | --- |
| 1 | Before teaching new nursing skills, ensure students understand the procedure standards. | 0.08 | 0.95 | 0.85 | .93 | -0.18 (.74) |
| 2 | Before teaching new nursing skills, ensure students master the procedure standards. | 0.18 | 0.91 | 0.78 | .94 | 0.29 (.60) |
| 3 | Demonstrate the nursing procedure while teaching new skills. | -0.27 | 1.02 | 0.95 | .93 | -0.10 (.85) |
| 4 | Highlight key points during the demonstration of nursing procedures. | -0.15 | 0.86 | 0.72 | .94 | 0.04 (.94) |
| 5 | Identify common errors in the nursing procedure. | -0.11 | 1.08 | 1.12 | .92 | -0.27 (.62) |
| 6 | Explain the theoretical knowledge related to the procedure standards. | 0.14 | 1.03 | 1.03 | .93 | 0.03 (.96) |
| 7 | Provide opportunities for students to practice. | -0.23 | 1.15 | 1.18 | .92 | 1.03 (.07) |
| 8 | Observe students while they practice. | -0.03 | 1.21 | 1.26 | .92 | -0.66 (.23) |
| 9 | Point out errors when students make mistakes during practice. | -0.63 | 0.66 | 0.54 | .94 | 0.00 (1.00) |
| 10 | Re-demonstrate the procedure when students make mistakes. | -0.03 | 1.05 | 0.84 | .93 | 0.51 (.36) |
| 11 | Provide hands-on assistance when students make mistakes. | -0.25 | 0.75 | 0.57 | .94 | 0.46 (.41) |
| 12 | Create opportunities for students to apply their skills in patient care. | -0.25 | 0.80 | 0.58 | .94 | 0.15 (.79) |
| 13 | Remind students to familiarize themselves with the evaluation forms for clinical practice. | -0.05 | 0.79 | 0.55 | .94 | -0.06 (.91) |
| 14 | Explain the scoring criteria on the evaluation form. | 0.45 | 1.09 | 0.81 | .93 | -0.28 (.60) |
| 15 | Provide a rationale for scores during evaluations. | 0.64 | 1.36 | 1.06 | .92 | -0.20 (.72) |
| 16 | Offer students the opportunity to explain or demonstrate the procedure if they disagree with the evaluation. | 0.53 | 0.93 | 0.75 | .93 | -0.68 (.22) |

Note: *r* = point-measure correlation

# Discussion

## Unidimensionality

The findings of this study show that there is only one dimension underlying student nurses’ perception of their mentors’ SP-NMAL. This is not in line with our conceptual framework for clinical nurse teachers’ assessment literate behaviors, which suggests three processes of assessment literate behaviors, that is, preparation, practices, and implementation (Chan & Luk, 2022; Chan & Luo, 2021). As suggested by past studies (e.g., Maclellan, 2001), students might not be assessment literate to distinguish the three assessment processes. Future studies can be conducted to examine whether the three-process framework applies to clinical nurse mentors’ assessment behaviors.

## Psychometric properties of the scale

This study shows good psychometric properties of the scale for students’ SP-NMAL. However, more than half (52%) of the students have a Rasch logit great than the items of the greatest difficulty. One of the potential explanations is that the items might be too easy for these students. Future studies can address this concern by adding more difficult items. Alternatively, students may hold a low bar to endorse the option of “Applies perfectly.” A comparison study using other options such as frequency can be conducted to test this conjecture.
